# Supplementary material for: Single cell census of human kidney organoids shows reproducibility and diminished off-target cells after transplantation
Source: PubMed Central journal article supplement (PMC6884507; doi:10.1038/s41467-019-13382-0), 2019-11-29
Supplement: 41467_2019_13382_MOESM2_ESM.pdf [file 41467_2019_13382_MOESM2_ESM.pdf]

## **Peer Review File**

**Editorial Note:** This manuscript has been previously reviewed at another journal that is not operating a transparent peer review scheme. This document only contains reviewer comments and rebuttal letters for versions considered at *Nature Communications*.
