# Supplementary material for: Single cell census of human kidney organoids shows reproducibility and diminished off-target cells after transplantation
Source: PubMed Central journal article supplement (PMC6884507; doi:10.1038/s41467-019-13382-0), 2019-11-29
Supplement: 41467_2019_13382_MOESM3_ESM.pdf [file 41467_2019_13382_MOESM3_ESM.pdf]

## **Description of Additional Supplementary Files**

Supplementary Data 1. Cluster gene lists for D29 after batch-correction (representative line: ThF)

Supplementary Data 2. Table of cell-cycle genes

Supplementary Data 3. Random forest gene lists

Supplementary Data 4: Cluster gene lists for iPSC after batch-correction (representative line: AS)

Supplementary Data 5. Table of germ layer signatures

Supplementary Data 6. Cluster gene lists for D7 after batch-correction (representative line: AS)

Supplementary Data 7. Cluster gene lists for D15 after batch-correction (representative line: ThF)

Supplementary Data 8. Cluster gene lists for joint D0,D7, D15 after batch-correction (representative line: ThF)

Supplementary Data 9. Table of kidney disease genes with references

Supplementary Data 10. Cluster gene lists for joint D29, D32, D51 after batch-correction (line: ThF)

Supplementary Data 11. Cluster gene lists for D32 transplanted organoid (line: ThF)
